1 **Type of article:** Original article

2 **Title:** Barley shoot biomass responds strongly to N:P stoichiometry and intraspecific competition,  
3 whereas roots only alter their foraging

4 **Running title:** Plant responses to stoichiometric availability of N and P

5 Amit Kumar<sup>1\*</sup>, Richard van Duijnen<sup>1</sup>, Benjamin M. Delory<sup>1</sup>, Rüdiger Reichel<sup>2</sup>, Nicolas  
6 Brüggemann<sup>2</sup>, Vicky M. Temperton<sup>1\*</sup>

7 <sup>1</sup>Ecosystem Functioning and Services, Institute of Ecology, Faculty of Sustainability, Leuphana  
8 University of Lüneburg, Universitätsallee 1, 21337, Lüneburg, Germany

9 <sup>2</sup>Forschungszentrum Jülich GmbH, Institute of Bio- and Geosciences, Agrosphere (IBG-3), 52425,  
10 Jülich, Germany

11

12 \*Corresponding authors:

13 Amit Kumar

14 [akumar4@gwdg.de](mailto:akumar4@gwdg.de); [kumar@leuphana.de](mailto:kumar@leuphana.de)

15

16 Vicky M. Temperton

17 [Vicky.temperton@leuphana.de](mailto:Vicky.temperton@leuphana.de)

## 1 Abstract

- 2       • **Background and Aims** Plants respond to various environmental stimuli, and root systems  
3       are highly responsive to the availability and distribution of nutrients in the soil. Root system  
4       responses to the limitation of either nitrogen (N) or phosphorus (P) are well documented,  
5       but how the early root system responds to (co-) limitation of one (N or P) or both (N and  
6       P) in a stoichiometric framework is not well known despite its relevance in agriculture. In  
7       addition, how plant-plant competition (here intra-specific) alters plant responses to N:P  
8       stoichiometry is understudied. Therefore, we aimed to investigate the effects of N:P  
9       stoichiometry and competition on root system responses and overall plant performance.
- 10       • **Methods** Plants (*Hordeum vulgare* L.) were grown in rhizoboxes for 24 days in the  
11       presence or absence of competition (three vs. one plant per rhizobox), and fertilized with  
12       different combinations of N:P (low N+low P, low N+high P, high N+low P, and high  
13       N+high P).
- 14       • **Key Results** Shoot biomass was highest when both N and P were provided in high  
15       amounts. In competition, shoot biomass decreased on average by 22%. Interestingly, N:P  
16       stoichiometry and competition had no clear effect on root biomass. However, we found  
17       distinct root responses in relation to biomass allocation across depths. Specific root length  
18       depended on the identity of limiting nutrient (N or P) and presence/absence of competition.  
19       Plants rooted deeper when N was the most limiting compared to shallower rooting when P  
20       was the most limiting nutrient.
- 21       • **Conclusions** Overall, our study sheds light on the early plant responses to plant-plant  
22       competition and stoichiometric availability of two macronutrients most limiting plant  
23       performance. With low N and P availability during early growth, higher investments in  
24       root system development can significantly trade off with aboveground productivity, and  
25       strong intra-specific competition can further strengthen such effects.
- 26 **Keywords:** Root system responses, vertical root distribution, specific root length, nutrient  
27 stoichiometry, intraspecific competition

## 1 INTRODUCTION

2 Nutrient foraging capacity of roots determines plant performance under both heterogeneous soil  
3 nutrient availability and belowground competition with neighbors (Stibbe and Märlander, 2002;  
4 Soleymani et al. 2011; Bennett et al. 2016; Reiss and Drinkwater, 2018). Given that nutrient  
5 foraging by roots is an active process (Zhang et al. 2019), it is very likely that plant biomass  
6 allocation and root system responses will be driven by the nutrient which is limiting plant growth  
7 the most (Poorter et al. 2012). It has previously been shown for many crops how eco-physiological  
8 (Gastal and Lemaire, 2002), morphological (Fransen et al. 1998), architectural (Williamson et al.  
9 2001; Lopez-Bucio et al. 2003; Postma and Lynch, 2012; Lynch, 2013; Guo and York, 2019), and  
10 anatomical (Wahl et al. 2001; Postma and Lynch, 2011) root traits respond to nitrogen (N) and  
11 phosphorus (P) availability in soil. For instance, Wang et al. (2015) showed contrasting root  
12 morphological and physiological trait responses of canola, barley, and potato in relation to low P  
13 availability. In order to increase P uptake, canola exuded more citric acid and developed longer  
14 roots, barley increased exudation of malic acid and reduced its root surface area and total root  
15 length, whereas potato reduced the exudation of organic acids but increased the number of root  
16 tips. Overall, it is clear that root systems respond in a species-specific way to nutrient stimuli by  
17 modifying their size and architecture (Kembel et al. 2008; Wang et al. 2015; McNickle et al. 2016).  
18 However, to what extent stoichiometric N:P availability in soil affects root systems, and how the  
19 observed effect depends on the strength of intraspecific competition has been rarely tested.  
20 For optimal plant physiology, the elemental N and P ratio in plant biomass should be relatively  
21 stable (Güsewell, 2004). Nitrogen is an integral part of most of the enzymatic machinery, and  
22 higher N than P demand in cell metabolism indicates that N limitation can severely affect plant  
23 growth and consequently biomass production. Hence, it becomes important to understand the root  
24 foraging responses to differential availability of both N and P during early plant establishment.  
25 Differences in mobility between N and P affect their availability to plants, and root responses are  
26 likely to be specific to nutrient distribution in soil. For example, P (as orthophosphate) is highly  
27 immobile in the soil and accumulates in the topsoil strata via plant residue and fertilizer inputs.  
28 Therefore, wide dispersion of lateral roots, enhanced adventitious rooting, and shallower root  
29 growth angles are among the key root responses that are associated with enhanced topsoil foraging  
30 for P (Lynch and Brown, 2001; Lynch, 2011). In contrast, N (as nitrate) is relatively mobile in the  
31 soil compared to P and moves down the soil strata with irrigation and precipitation events. Fewer

1 crown roots in maize, for example, can potentially improve N acquisition by exploring deep soil  
2 strata, a key root system response (Saengwilai et al. 2014; Guo and York, 2019). Therefore, the  
3 coordinated uptake and utilization of both N and P are essential in relation to optimal plant growth.  
4 However, very little is known about how plants adjust their biomass allocation and root growth  
5 responses to soil N:P stoichiometry. It is further not clear how co-limitation of both N and P will  
6 direct the plant's response for their uptake.

7 Root responses not only depend on soil nutrient availability but also on the presence of neighbors  
8 (whether of the same or different species) through root-root competition for available nutrients  
9 (Cahill et al. 2010; Faget et al., 2013; McNickle and Brown, 2014, Weidlich et al. 2018). This is  
10 particularly true in mono-cropping systems where there is strong intraspecific competition for soil  
11 nutrients, mainly because neighbors share the same life-history strategies and have similar resource  
12 demands. Intense competition results in a direct negative effect on plant growth and ultimately on  
13 yield. Bennett et al. (2016) have shown interactive effects of nutrients with or without inter- and  
14 intraspecific competition on plant biomass allocation and root system responses for grasses,  
15 legumes, and forbs. Further, Hecht et al. (2016) showed for barley that roots respond to greater  
16 intraspecific competition (via manipulating sowing density) by increasing root length density and  
17 specific root length through increased fine root production. Later, Hecht et al. (2019) showed that  
18 the greater root length density under intraspecific competition was attributed to greater main root  
19 numbers. Moreover, root responses to the intraspecific competition may also include root  
20 segregation and aggregation to maximize the acquisition of nutrients (Cahill et al. 2010; Weidlich  
21 et al. 2018; Zhang et al. 2019).

22 Regardless of understanding how the availability of either N or P and belowground competition  
23 affects plant growth (Thuynsma et al. 2016; Sun et al. 2016), it is unclear how plants integrate the  
24 responses to differential nutrient availability and the presence or absence of intraspecific  
25 competition during early growth stages. The aim of this study was twofold: (1) investigating how  
26 N:P stoichiometry in the soil solution affects plant performance and root system responses of  
27 barley (*Hordeum vulgare* L.); and (2) determining if intraspecific competition interacts with N:P  
28 stoichiometry in shaping plant performance.

29 We hypothesized that:

- 1 (1) From the nutrient stoichiometry perspective, N is more limiting than P for plant growth and  
2 low availability of N has stronger effects than that of P on plant performance (both below- and  
3 aboveground).
- 4 (2) The intraspecific competition will lead to strong nutrient depletion, resulting in overall biomass  
5 reduction per plant.
- 6 (3) Root distribution and foraging strategy will be affected by N:P stoichiometry, with plants  
7 rooting deeper when N is limiting and shallower when P is limiting, and the strength of the  
8 response will be modulated by intraspecific competition.

## 1 MATERIALS AND METHODS

### 2 *Experimental setup*

3 The experiment was conducted in the greenhouse of the Leuphana University Lüneburg  
4 (Lüneburg, Germany, 53°14'23.8"N 10°24'45.5"E) from August 18<sup>th</sup> 2017 to September 11<sup>th</sup> 2017  
5 for a total of 24 days. The average day/night temperature and relative humidity were 22.3/15.3°C  
6 and 60/73%, respectively. Briefly, a homogenous soil mixture was prepared using sand, loess soil  
7 (nutrient-poor, collected from a lignite mine near Jackerath, Germany), and peat potting soil  
8 (Nullerde, Einheitserde Werkverband e.V., Germany) in 8:2:1 ratio, respectively. Rhizoboxes  
9 (Height: 58 cm × Width: 26.6 cm × Thickness: 2 cm; volume: 3 L) were filled with ~ 5 kg of soil  
10 mixture. Pre-germinated (pre-germination time: 24 h on a wet tissue paper) barley (*Hordeum*  
11 *vulgare* L. cv. Barke, Saatzucht Breun, Germany) seedlings were transplanted in rhizoboxes as  
12 shown in Fig.1. Each rhizobox received 1 seedling for absence and 3 seedlings (7.5 cm apart from  
13 each other) for the presence of intraspecific competition (hereafter competition). Rhizoboxes were  
14 placed in containers at a 45° angle and each container contained five rhizoboxes. In each container,  
15 the front rhizobox was covered with a black plastic plate and the last rhizobox was covered with a  
16 white polystyrene plate to maintain similar light and temperature conditions, respectively.  
17 Rhizobox position was randomly changed every fourth day.

18 The experiment was designed using a full factorial design to test how N:P stoichiometry (four  
19 levels: low N+low P, low N+high P, high N+low P, high N+high P) (based on pre-test showing  
20 that shoot growth was limited by N only above a ‘threshold’ of low P availability) and intraspecific  
21 competition (two levels: absence or presence of competitors) affect biomass production and  
22 allocation, soil exploration by roots, and N:P uptake of barley. In total, 8 treatment combinations  
23 were tested (4 levels of N:P stoichiometry × 2 levels of intraspecific competition) and each  
24 treatment was replicated five times resulting in a total of 40 experimental units (rhizoboxes).  
25 Rhizoboxes were provided with 800 mL of half Hoagland concentration per rhizobox before  
26 transplanting. The composition of the Hoagland solution was adjusted for each N:P stoichiometry  
27 level (low/high N, low/high P) [**Supplementary Information table 1**]. To maintain the osmotic  
28 potential, we used K<sub>2</sub>SO<sub>4</sub> and CaCl<sub>2</sub>·2H<sub>2</sub>O as a replacement for KH<sub>2</sub>PO<sub>4</sub>, Ca(NO<sub>3</sub>)<sub>2</sub>·4H<sub>2</sub>O and  
29 KNO<sub>3</sub> as mentioned in table 1. Rhizoboxes were left to drain for 24h and subsequently weighed.  
30 Every two days, a volume of deionized water equivalent to the evaporative loss was added to each  
31 rhizobox in order to maintain a constant weight.

1

## 2 *Harvest and measurements*

3 At harvest, shoots were cut at the base and oven-dried at 80 °C until a constant mass was reached.  
4 Afterward, we carefully removed the front window of each rhizobox and divided the soil into six  
5 10-cm layers (0-10, 10-20, 20-30, 30-40, 40-50, 50-58 cm). For each soil layer, roots were washed  
6 with tap water and stored at -20 °C until further measurements. We followed the protocol of Delory  
7 et al. (2017) for root trait measurements. Briefly, material adhering to roots was removed with  
8 brush and tweezers. In order to improve fine root detection during image analysis, clean roots were  
9 stained with a 1.7 mM neutral red solution for ~24 h. Excess stain was removed by continuously  
10 rinsing roots with distilled water, and big root segments were cut into small pieces to avoid root  
11 overlaps during scanning. Stained roots were spread in a thin layer of distilled water in a  
12 transparent tray and scanned at 600 dpi using a commercial scanner (Epson Perfection V800 Photo,  
13 Epson, Japan). Scanned images were then analyzed with an image analysis software (WinRhizo,  
14 Regent Instruments, Quebec, Canada) using a global thresholding method. Interactive  
15 modifications to grey level pixel classification were made to improve root detection and root length  
16 estimation (Delory et al. 2017). Afterward, roots were dried at 60 °C until a constant mass was  
17 reached. Root mass fraction (RMF) was calculated as the ratio of root biomass to the total plant  
18 biomass, and specific root length (SRL) was calculated as root length per unit of root biomass.  
19 All shoot material was ground with a ball mill (MM 400, Retsch, Germany), and measured for  
20 total C and N with an elemental analyzer (Vario EL, Elementar, Germany). For shoot P  
21 concentration, 70 mg ground samples were spiked with 2 mL HNO<sub>3</sub> (65%) and 1 mL H<sub>2</sub>O<sub>2</sub> (30%)  
22 before microwave extraction, using a MARS 5 microwave system (CEM GmbH, Germany) at  
23 800W (80%) power, a linear temperature gradient from RT to 160°C in 20 min, holding the end  
24 temperature for 15 min. Afterward, each sample was filled up to 14 mL with ultrapure water. For  
25 P concentration determination, two aliquots of the obtained solution were diluted 1:20 with  
26 ultrapure water and analyzed. The relative standard deviation between the two repetitions was ±  
27 10%. Total P was measured with inductively coupled plasma optical emission spectrometry  
28 (iCAP™ 7600 ICP-OES Analysator, Thermo Scientific, Germany).

## 29 *Vertical root distribution*

30 The vertical root distribution in each rhizobox was modeled using the following asymptotic  
31 equation (Gale and Grigal, 1987; Jackson et al. 1996; Oram et al. 2018):

1 
$$Y = 1 - \beta^d$$

2 Where  $Y$  is the cumulative proportion [0,1] of the total root biomass located above depth  $d$  (in this  
3 case 0 – 58 cm), and  $\beta$  is a fitted model parameter used as a simple numerical index of vertical root  
4 distribution (Schnepf et al. 2019). Lower  $\beta$  values correspond to higher root mass allocation to  
5 surface layers, whereas higher values correspond to higher root mass allocation to deeper soil strata  
6 (Fig. 2).

7 *Statistical analyses*

8 All statistical analyses were performed in R 3.5.0 (R Core Team, 2018) and graphs were prepared  
9 with ‘ggplot2’ library (Wickham, 2016) and R-base. The presence of potential outliers was  
10 determined graphically using the *dotchart* function. Presented in graphs are mean values of 5  
11 replicates (4 replicates for specific root length except for LN-HP where  $n = 5$ )  $\pm$  standard error  
12 (SE). Two-way ANOVA models were used to test if N:P stoichiometry, intraspecific competition,  
13 and their interaction affected shoot and root biomass, vertical root distribution ( $\beta$ ), specific root  
14 length, and shoot N and P concentrations. Residual plots were used to check for any patterns in  
15 our data. Pairwise comparisons were performed on estimated marginal means computed by  
16 *lsmeans* using Tukey contrasts (*lsmeans*; Lenth, 2016). In case there was no interaction between  
17 N:P stoichiometry and competition, we show only N:P stoichiometry effects (for shoot biomass  
18 and shoot P concentration). The linear relationship between shoot N concentration and specific  
19 root length was analyzed using standard major axis (SMA) regression using the *smatr* package  
20 (Warton et al. 2012). SMA regression examines the relationship between two variables that are  
21 both measured with errors (Warton et al. 2012).

22



## 1 RESULTS

### 2 *Shoot biomass*

3 Both N:P stoichiometry ( $F_{3,32} = 53.08$ ,  $P < 0.001$ ) and competition ( $F_{1,32} = 52.07$ ,  $P < 0.001$ ) had  
4 a significant effect on shoot biomass production. The effect of N:P stoichiometry did not depend  
5 on the level of intraspecific competition ( $F_{3,32} = 0.48$ ,  $P = 0.69$ ). Looking at the effect of N:P  
6 stoichiometry, shoot biomass increased in the following order: LN-LP < LN-HP < HN-LP < HN-  
7 HP. Compared to LN-LP, shoot biomass was on average 12%, 32%, and 58% greater under LN-  
8 HP, HN-LP, and HN-HP, respectively (Fig. 3A). For plants grown in the presence of competitors,  
9 shoot biomass was on average 22% lower than plants grown in the absence of competition.

### 10 *Root system responses*

11 Even though the greater amount of either N, P, or both increased shoot biomass, neither N:P  
12 stoichiometry ( $F_{3,32} = 0.79$ ,  $P = 0.51$ ) nor competition ( $F_{1,32} = 1.49$ ,  $P = 0.24$ ) had an effect on total  
13 root biomass production (Fig. 3B). However, biomass allocation as measured by the RMF was  
14 affected by N:P stoichiometry ( $F_{3,32} = 32.62$ ,  $P < 0.001$ ), competition ( $F_{1,32} = 26.01$ ,  $P < 0.001$ ),  
15 and their interaction ( $F_{3,32} = 5.77$ ,  $P = 0.002$ ). Irrespective of the presence or absence of  
16 competition, RMF was greater when both N and P were provided in low amounts (LN-LP) (Fig.  
17 4). A high amount of either N, P, or both decreased RMF when plants were grown without  
18 competition. In contrast, when plants were grown in competition, providing high P (LN-HP) had  
19 no effect on RMF as compared to LN-LP (Fig. 4). In addition, providing high N with low or high  
20 P (HN-LP and HN-HP) reduced RMF both in the presence and absence of competitors.

21 Vertical root distribution ( $\beta$ ) was affected differently across N:P stoichiometry levels for plants  
22 growing alone or in competition (N:P stoichiometry:  $F_{3,32} = 22.19$ ,  $P < 0.001$ ; competition:  $F_{1,32} =$   
23  $59.46$ ,  $P < 0.001$ ; N:P stoichiometry  $\times$  competition:  $F_{3,32} = 4.85$ ,  $P = 0.006$ ). Vertical root  
24 distribution was governed by the identity of the nutrient being the most limiting (either N, P, or  
25 both) only for individually grown barley plants (in absence of competition). Without competition,  
26 plants rooted the deepest (greatest  $\beta$  value) when both N and P were provided in low amounts (LN-  
27 LP). On average, plants grown without competition in the LN-HP treatment also rooted deeper  
28 than the ones growing in the HN-LP and HN-HP treatments (Fig. 5A). Interestingly, the presence  
29 of competitors had a strong effect on the vertical root distribution measured at the population level.  
30 In this situation, the identity of the nutrient being the most limiting did not have any impact on

1 root distribution. Overall, plants tended to increase their biomass allocation in roots to deeper soil  
2 layers (greater  $\beta$  values) when growing in competition (Fig. 5A).

3 Even though the belowground biomass production remained similar between experimental  
4 treatments, root morphology was clearly impacted. Specific root length (SRL) was affected by N:P  
5 stoichiometry ( $F_{3,32} = 7.06$ ,  $P = 0.001$ ) and interacted with competition ( $F_{3,32} = 5.70$ ,  $P = 0.003$ ),  
6 but competition alone had no effect on SRL (Fig. 5B). Without competition, SRL was greater when  
7 either N, P, or both were provided in low amounts and did not depend on the identity of the nutrient  
8 being the most limiting. In contrast, in the presence of competition, SRL was greater only when P  
9 was the only limiting nutrient (HN-LP) (Fig. 5B).

#### 10 *Shoot N:P concentrations*

11 N:P stoichiometry and competition (presence/absence) had distinct effects on shoot N and P  
12 concentrations. Providing more N (HN-LP and HN-HP) or more P (LN-HP and HN-HP) resulted  
13 in greater shoot N and P concentrations, respectively. Shoot N concentration was significantly  
14 altered by N:P stoichiometry ( $F_{3,32} = 222.9$ ,  $P < 0.001$ ), competition ( $F_{1,32} = 259.3$ ,  $P < 0.001$ ), and  
15 their interaction ( $F_{3,32} = 10.9$ ,  $P < 0.001$ ) (Fig. 6A). Without competition, shoot N remained similar  
16 for both HN-LP and HN-HP, whereas, in the presence of competition, plant shoots had a greater  
17 N concentration under HN-LP than HN-HP (Fig. 6A). On the other hand, shoot P concentration  
18 was altered only by N:P stoichiometry ( $F_{3,32} = 9.19$ ,  $P < 0.001$ ). Providing more P increased its  
19 concentration in shoots on average by 53% (LN-HP) and 42% (HN-HP) (Fig. 6B). Our results also  
20 showed the existence of a positive correlation between SRL and shoot N concentration (no  
21 correlation between SRL and shoot P concentration), but only under intraspecific competition (Fig.  
22 7). Further, shoot N:P mass ratio was affected by N:P stoichiometry ( $F_{3,32} = 21.72$ ,  $P < 0.001$ ) and  
23 competition ( $F_{1,32} = 5.50$ ,  $P = 0.025$ ). Compared to LN-LP, lower shoot N:P values were observed  
24 when N was the only limiting nutrient, while greater shoot N:P values were observed when P was  
25 the only limiting nutrient in the soil solution [**Supplementary Information Fig. S1**]. Shoot N:P  
26 ratios decreased from  $24.6 \pm 2.3$  to  $20.1 \pm 2.1$  in the presence of intraspecific competition.

## 1 **DISCUSSION**

### 2 *Shoot but not root biomass production is more limited by N than by P*

3 There is a general consensus that plants respond to nutrient shortage by changing their allocation  
4 patterns both below- and aboveground. When the availability of both macronutrients was low (LN-  
5 LP), aboveground productivity was the lowest, indicative of nutrient limitation. On the other hand,  
6 providing extra P or not, did not increase the shoot biomass production if N was the limiting  
7 nutrient (both in LN-LP and LN-HP), highlighting higher N demand for biomass production. Leaf  
8 N content is generally related to C assimilation during photosynthesis (Gastal and Lemaire, 2002).  
9 If reduced leaf N content leads to a reduction in the plant's photosynthetic activity, a lower shoot  
10 biomass production can be expected when N is limiting in the soil (Fig.1). Andrew et al. (1999)  
11 showed for *Pisum sativum*, *Triticum aestivum*, and *Phaseolus vulgaris* that N shortage effects on  
12 plant growth are through its effects on protein synthesis. This further demonstrates that N  
13 limitation is more severe than P limitation for plant growth (see Capek et al. 2018) as the  
14 availability of extra P (LN-HP) in our study did not lead to higher shoot biomass production,  
15 probably due to N-mediated decrease in photosynthetic activity. Increased availability of both N  
16 and P (HN-HP), on the other hand, resulted in the greatest shoot biomass production because of  
17 greater N and P uptake that might ultimately lead to higher photosynthetic activity (Kumar et al.  
18 2019).

19 Interestingly, root biomass production remained similar across N:P stoichiometry levels, but the  
20 RMF was greater when both N and P availability was low (LN-LP) in the absence of competition.  
21 This follows the general plant response to increasing C investment belowground when nutrient  
22 availability in the environment is low (Poorter et al. 2012).

23 Nutrient availability can strongly direct resource allocation patterns in plants (Gastal and Lemaire,  
24 2002). More C allocation to roots under low nutrient availability is a well-known plant response  
25 as a potential mechanism to optimize growth by exploring a greater proportion of the soil volume  
26 for nutrients (de Groot et al. 2003; Hammond et al. 2006; Lambers et al. 2006). This is in line with  
27 optimal resource allocation theory, which predicts higher resource partitioning in organs that  
28 maximize the plant growth (Bloom et al. 1985). Increased RMF due to nutrient shortage allows  
29 plants to forage more effectively, yet it trades off with resource allocation in shoot biomass  
30 production (Garnett et al. 2009). We are aware that RMF only provides information about resource  
31 allocation to root growth component and does not necessarily include other carbon investments

1 such as root respiration and exudation, yet it provides a hint about plant investments belowground  
2 for nutrient foraging. Greater availability of both N and P (HN-HP) has potentially led to lower  
3 investment belowground as shown in various studies for different vegetation (Aerts et al. 1991;  
4 Klimes and Klimesova, 1994; Wright et al. 2014). This further supports the notion of preferential  
5 uptake of available nutrients by roots, thereby minimizing their resource investments belowground  
6 for nutrient acquisition. These findings partly support our first hypothesis as the response to N  
7 limitation was only seen for the shoot but not root biomass.

#### 8 *Intraspecific competition reduces shoot but not root biomass production*

9 There is less debate with regard to the effect of competition (whether inter- or intraspecific) on  
10 biomass production, with several studies showing a decrease in plant biomass when growing in  
11 competition (Zhou et al. 2017; Heuermann et al. 2019). We also show that shoot biomass decreased  
12 in the presence of competition. A common underlying reason for this decline in biomass  
13 production when plants are competing is due to quick uptake of available nutrients leading to soil  
14 nutrient shortage (Tilman, 1990; Craine and Dybzinski, 2013). Surprisingly, we did not observe  
15 any change in root biomass production with or without competition. When plants are competing,  
16 and if plant growth is mostly affected by nutrient availability in soil, we would expect a greater  
17 resource investment in belowground organs to enhance nutrient uptake. In the presence of  
18 competition, a strong decrease in shoot biomass without altering root biomass per plant is  
19 confirmatory of increasing competitive ability for belowground resources, but at the expense of  
20 shoot biomass production. This also hints towards the plant's phenotypic plasticity in biomass  
21 partitioning between shoots and roots. According to the competition model for limiting resources  
22 (Van Wijk et al. 2003), a lower investment belowground cannot sustain plant growth due to lower  
23 nutrient availability when plants are competing with each other. To maintain growth, therefore,  
24 higher investment in roots should be favored. In a recent study focusing on interspecific  
25 competition (growing oat with clover), increased root to shoot ratio without affecting shoot  
26 biomass production highlights that competition favored root biomass production for nutrient  
27 access (Heuermann et al. 2019). Further, the observed increase in RMF without affecting total root  
28 biomass under low N availability (LN-LP and LN-HP) supports our first hypothesis that N is more  
29 limiting plant growth than P limitation. Secondly, our second hypothesis is partly supported as  
30 only shoot biomass but not root biomass decreased with the intraspecific competition.

#### 31 *Plants root deeper when limited by N, but only when growing without competitors*

1 Root biomass may not always be indicative of the absorptive capacity of roots, and significant  
2 modifications in root morphology, anatomy, and architecture are possible with or without altering  
3 the total root biomass (Hodge, 2004). In our study, although the total root biomass remained similar  
4 between experimental treatments, we showed that the effect of N:P stoichiometry affected root  
5 system responses differently depending on the presence or absence of competitors. Such root  
6 system responses can be driven by relative mobility and, therefore, availability of N and P in soil  
7 strata. Vertical root distribution depended strongly on the identity of the limiting nutrient (either  
8 N, P, or both) in the absence of competition. For example, plants rooted shallower (lower  $\beta$  value)  
9 when P availability was low (HN-LP) whereas plants rooted deeper (higher  $\beta$  value) when N was  
10 the most limiting nutrient (LN-HP). Interestingly, when both nutrients were limiting (LN-LP),  $\beta$   
11 was greatest thus suggesting that vertical root distribution was more likely driven by N limitation  
12 than P limitation and higher N than P demand. Given that P is less mobile than N in the soil matrix  
13 (Harrison, 1987), we expect more P to be present in the topsoil and more N to be present in deeper  
14 soil layers, and their relative limitations may have guided root responses. Plants respond to P  
15 shortage by reducing the primary root elongation but an increased number of lateral roots (Vance  
16 et al. 2003; Sanchez-Calderon et al. 2005). Further, Jia et al. (2018) showed that increasing the  
17 lateral root branching enhanced maize P acquisition. Gruber et al. (2013) also showed a shallower  
18 yet highly branched root system for *Arabidopsis* under P deficiency. On the other hand, when N  
19 is limiting plant growth, the plant's investment in deep root systems is favored (Koevoets et al.  
20 2016). In the presence of competition,  $\beta$  values did not change across N:P stoichiometry levels.  
21 Competition most likely resulted in quick nutrient uptake. Therefore, roots foraged throughout the  
22 rhizobox to their maximum extent to get excess to both N and P. In support of our third hypothesis,  
23 we show that plants root deeper when N is the most limiting nutrient, whereas shallower when P  
24 is the most limiting nutrient, but only in the absence of competition. Further, in the presence of  
25 intraspecific competition, root foraging is modulated by deeper soil exploration.  
26 We also showed that, in the absence of competition, the SRL was greater when either N, P, or both  
27 were available in low amounts relative to HN-HP (Fig. 5B). Changes in SRL are general root  
28 morphological responses to lower availability of nutrients in the soil (Kong et al. 2014). By  
29 increasing SRL without altering the overall root biomass, plants are able to increase their foraging  
30 capacity. However, this may also be an apparent strategy of plants for nutrient acquisition as  
31 thinner roots have a lower life span and faster turnover (McCormack et al. 2012). On the contrary,

1 when both N and P are not limiting plant growth (under HN-HP), it is more favorable for plants to  
2 invest less in increasing SRL due to associated aboveground allocation trades off. We expected  
3 the same effect of N:P stoichiometry on SRL in the presence of competition. However, we found  
4 contrasting effects, and SRL was lower when only N (LN-HP) or both N and P (LN-LP) were  
5 available in low amounts, whereas it increased only under HN-LP (high N but low P availability).  
6 As P is less mobile than N in the soil, increasing P foraging by greater SRL is likely one efficient  
7 strategy to increase its uptake. In contrast, greater N mobility would rather result in a deeper  
8 rooting system than increasing SRL locally to increase its uptake efficiently. Greater SRL with  
9 low P but high N availability (HN-LP) resulted in higher N uptake and associated higher P  
10 requirement. However, increased SRL did not result in higher P uptake due to its low availability.  
11 This further explains the positive relationship between SRL and shoot N uptake (probably as an  
12 indirect consequence of P limitation) (Fig. 7). These findings contrast strongly with results from a  
13 study in grasslands by Mommer et al. (2010), where interspecific competition with neighbors  
14 caused both higher investment of plants in root biomass as well as an accumulation of roots in the  
15 topsoil. This contrasting result could be driven by differences in root responses depending on  
16 whether neighbors are of the same or different species. Clearly, the presence of neighbors, whether  
17 of the same species or not, can drive this partly unexpected responses of roots. Whether  
18 experimental conditions are controlled (in the greenhouse) or not (in the field) will also probably  
19 affect the outcome.

20

#### 21 *Effect of N:P stoichiometry and competition on shoot N and P concentrations*

22 Shoot N and P concentrations were in line with what was expected. Providing high N (HN-LP and  
23 HN-HP) or high P (LN-HP and HN-HP) resulted in greater N and P concentrations in shoots,  
24 respectively. Intriguingly, in the presence of competition, we found that when both N and P  
25 availability was high (HN-HP), shoot N concentration was slightly lower than in plants grown  
26 under high N and low P (HN-LP) availability. This can most likely be explained by the fact that  
27 when both N and P were high, plants grew better (higher shoot biomass under HN-HP than HN-  
28 LP) and, as a consequence, exacerbated greater N demand. On the other hand, shoot P  
29 concentration was driven only by its availability in the soil and was similar for both with or without  
30 competition. This further supports our first hypothesis that soil N availability has a stronger effect  
31 in regulating plant performance more than P.

## 1 **CONCLUSIONS**

2 Early plant responses to soil nutrient availability and plant-plant competition are decisive for plant  
3 performance. Lower shoot biomass under low N availability irrespective of P availability (both for  
4 LN-LP and LN-HP) indicates N limitation for shoot biomass production most likely due to higher  
5 N demand for photosynthesis. Higher investments belowground as a response to nutrient limitation  
6 pose a tradeoff with shoot biomass production. Roots foraged differently for N or P uptake by  
7 rooting deeper when N was limiting, but rooting shallower when P was limiting plant growth.  
8 However, when plants were competing for N and P in soil solution, no decrease in root biomass  
9 but lower shoot biomass per plant indicated differential resource allocation pattern by plants for  
10 maximizing nutrient uptake. When competing, plants rooted deeper indicating higher N demand  
11 and associated root acquisition strategy under these conditions. Such shift in plant resource  
12 allocation and root growth are key determinants for early plant nutrient acquisition and  
13 establishment, and illustrate the importance of biotic as well as abiotic drivers of plant responses  
14 to their environment. Field studies that manipulate N:P stoichiometry and focus on root foraging  
15 responses would move the field further forward now.

1 **FUNDING**

2 This work was supported by the BonaRes soil sustainability program of the Federal German  
3 Ministry for Education and Research (BMBF) for funding this research within the ‘INPLAMINT  
4 – Increasing agricultural nutrient-use efficiency by optimizing plant-soil-microorganism  
5 interactions’ project [grant numbers: 031A561A, 031A561H, 031B0508A, 031B0508H].

6

7 **ACKNOWLEDGMENTS**

8 We thank Thomas Niemeyer for greenhouse assistance, Saatzucht Breun for supplying barley  
9 seeds free of charge, Dr. Kathleen Lemanski and Prof. Michael Bonkowski for arranging the  
10 Jackerath loess soil, Hannes Schempp, Hannah Uther, Johanna Wille, and IAESTE students for  
11 root scanning and laboratory assistance.

12

13 **DATA AVAILABILITY**

14 Raw data and R scripts used for data analyses can be freely accessed at  
15 <https://doi.org/10.5281/zenodo.3613623>



## 1 LITERATURE CITED

- 2 **Aerts R, Boot RGA, van der Aart PJM. 1991.** The relation between above- and belowground  
3 biomass allocation patterns and competitive ability. *Oecologia* **87**: 551–559.
- 4 **Andrews M, Sprent JI, Eady PE. 1999.** Relationships between shoot to root ration, growth and  
5 leaf soluble protein concentration of *Pisum sativum*, *Phaseolus vulgaris* and *Triticum aestivum*  
6 under different nutrient deficiencies. *Plant, Cell and Environment* **22**: 949-958.
- 7 **Bennett JA, Riibak K, Tamme R, Lewis RJ, Pärtel M. 2016.** The reciprocal relationship between  
8 competition and intraspecific trait variation. *Journal of Ecology* **104**: 1410–1420.
- 9 **Bloom J, Stuart F, Mooney A. 1985.** Resource limitation in plants-an economic analogy. **Annual**  
10 **Reviews of Ecology and Systematics** **16**: 363-392.
- 11 **Cahill JF, McNickle GG, Haag JJ, Lamb EG, Nyanumba SM, Clair CCS. 2010.** Plants integrate  
12 information about nutrients and neighbors. *Science* **328**: 1657.
- 13 **Čapek P, Manzoni S, Kaštovská E, Wild B, Diáková K, et al. 2018.** A plant–microbe interaction  
14 framework explaining nutrient effects on primary production. *Nature Ecology and Evolution* **2**:  
15 1588–1596.
- 16 **Craine JM, Dybzinski R. 2013.** Mechanisms of plant competition for nutrients, water and light (D  
17 Robinson, Ed.). *Functional Ecology* **27**: 833–840.
- 18 **Delory BM, Weidlich EWA, Meder L, Anna L, Duijnen R Van, Weidlich R, Temperton VM. 2017.**  
19 Accuracy and bias of methods used for root length measurements in functional root research.  
20 *Methods in Ecology and Evolution* **8**: 1594–1606.
- 21 **Faget M, Nagel KA, Walter A, Herrera JM, Jahnke S, Schurr U, Temperton VM. 2013.** Root-root  
22 interactions: Extending our perspective to be more inclusive of the range of theories in ecology  
23 and agriculture using in-vivo analyses. *Annals of Botany* **112**: 253–266.
- 24 **Fransen B, Berendse F. 1998.** Root morphological plasticity and nutrient acquisition of perennial  
25 grass species from habitats of different nutrient availability. *Oecologia* **115**: 351–358.
- 26 **Gale MR, Grigal DF. 1987.** Vertical root distributions of northern tree species in relation to  
27 successional status. *Canadian Journal of Forest Research* **17**: 829-834.
- 28 **Garnett T, Conn V, Kaiser BN. 2009.** Root based approaches to improving nitrogen use efficiency  
29 in plants. *Plant, Cell and Environment* **32**: 1272–1283.
- 30 **Gastal F, Lemaire G. 2002.** N uptake and distribution in crops: An agronomical and  
31 ecophysiological perspective. *Journal of Experimental Botany* **53**: 789–799.
- 32 **De Groot CC, Marcelis LFM, Van Den Boogaard R, Kaiser WM, Lambers H. 2003.** Interaction of  
33 nitrogen and phosphorus nutrition in determining growth. *Plant and Soil* **248**: 257–268.
- 34 **Gruber BD, Giehl RFH, Friedel S, von Wirén N. 2013.** Plasticity of the Arabidopsis root system  
35 under nutrient deficiencies. *Plant Physiology* **163**: 161–179.

- 1 **Guo H, York L. 2019.** Reallocation to lateral and early-emerging axial roots allows maize (*Zea*  
2 *mays* L.) with reduced nodal root number to more efficiently forage for nitrate. *Journal Of*  
3 *Experimental Botany* **70**: 5299-5309.
- 4 **Güsewell S. 2004.** N:P ratios in terrestrial plants: Variation and functional significance. *New*  
5 *Phytologist* **164**: 243–266.
- 6 **Harrison AF. 1987.** Soil organic phosphorus: a review of world literature. CAB international,  
7 Wallingford, UK
- 8 **Hecht VL, Temperton VM, Nagel KA, Rascher U. 2016.** Sowing density : a neglected factor  
9 fundamentally affecting root distribution and biomass allocation of field grown spring barley (*Hordeum*  
10 *vulgare* L.). *Frontiers in Plant Science* **7**: 1–14.
- 11 **Hecht VL, Temperton VM, Nagel KA, Rascher U, Pude R, Postma JA. 2019.** Plant density modifies  
12 root system architecture in spring barley (*Hordeum vulgare* L.) through a change in nodal root  
13 number. *Plant and Soil* **439**: 179–200.
- 14 **Hermans C, Hammond JP, White PJ, Verbruggen N. 2006.** How do plants respond to nutrient  
15 shortage by biomass allocation? *Trends in Plant Science* **11**: 610–617.
- 16 **Heuermann D, Gentsch N, Boy J, Schweneker D, Feuerstein U, Groß J, Bauer B, Guggenberger**  
17 **G, von Wirén N. 2019.** Interspecific competition among catch crops modifies vertical root  
18 biomass distribution and nitrate scavenging in soils. *Scientific Reports* **9**: 1–11.
- 19 **Hodge A. 2004.** The plastic plant: Root responses to heterogeneous supplies of nutrients. *New*  
20 *Phytologist* **162**: 9–24.
- 21 **Hodge A, Robinson D, Griffiths B, Fitter A. 1999.** Nitrogen capture by plants grown in N-rich  
22 organic patches of contrasting size and strength. *Journal of Experimental Botany* **50**: 1243–1252.
- 23 **Jackson RB, Canadell J, Ehleringer JR, Mooney HA, Sala OE, Schulze ED. 1996.** A global analysis  
24 of root distributions for terrestrial biomes. *Oecologia* **108**: 389–411.
- 25 **Jia X, Liu P, Lynch JP. 2018.** Greater lateral root branching density in maize improves phosphorus  
26 acquisition from low phosphorus soil. *Journal of Experimental Botany* **69**: 4961-4790.
- 27 **Kembel SW, De Kroon H, Cahill JF, Mommer L. 2008.** Improving the scale and precision of  
28 hypotheses to explain root foraging ability. *Annals of Botany* **101**: 1295–1301.
- 29 **Klimeš L, Klimešová J. 1994.** Biomass allocation in a clonal vine: Effects of intraspecific  
30 competition and nutrient availability. *Folia Geobotanica* **29**: 237–244.
- 31 **Koevoets IT, Venema JH, Elzenga JTM, Testerink C. 2016.** Roots withstanding their environment:  
32 Exploiting root system architecture responses to abiotic stress to improve crop tolerance.  
33 *Frontiers in Plant Science* **7**: 1–19.
- 34 **Kong D, Ma C, Zhang Q, Li L, Chen X, Zeng H, Guo D. 2014.** Leading dimensions in absorptive root  
35 trait variation across 96 subtropical forest species. *New Phytologist* **203**: 863–872.
- 36 **Kumar A, Shahbaz M, Koirala M, Blagodatskaya E, Seidel SJ, Kuzyakov Y, Pausch J. 2019.** Root

- 1 trait plasticity and plant nutrient acquisition in phosphorus limited soil. *Journal of Plant Nutrition*  
2 *and Soil Science* **182**: 945-952
- 3 **Lambers H, Shane MW, Cramer MD, Pearse SJ, Veneklaas EJ. 2006.** Root structure and  
4 functioning for efficient acquisition of phosphorus: Matching morphological and physiological  
5 traits. *Annals of Botany* **98**: 693–713.
- 6 **Lenth RV. 2016.** Least-Squares Means: The R Package lsmeans. *Journal of Statistical Software* **69**:  
7 1-33.
- 8
- 9 **López-Bucio J, Cruz-Ramírez A, Herrera-Estrella L. 2003.** The role of nutrient availability in  
10 regulating root architecture. *Current Opinion in Plant Biology* **6**: 280–287.
- 11 **Luke McCormack M, Adams TS, Smithwick EAH, Eissenstat DM. 2012.** Predicting fine root  
12 lifespan from plant functional traits in temperate trees. *New Phytologist* **195**: 823–831.
- 13 **Lynch JP. 2011.** Root phenes for enhanced soil exploration and phosphorus acquisition : tools for  
14 future crops. *Plant Physiology* **156**: 1041–1049.
- 15 **Lynch JP. 2013.** Steep, cheap and deep: An ideotype to optimize water and N acquisition by maize  
16 root systems. *Annals of Botany* **112**: 347–357.
- 17 **Lynch JP, Brown KM. 2001.** Topsoil foraging - An architectural adaptation of plants to low  
18 phosphorus availability. *Plant and Soil* **237**: 225–237.
- 19 **McNickle GG, Brown JS. 2014.** When Michaelis and Menten met Holling: Towards a mechanistic  
20 theory of plant nutrient foraging behaviour. *AoB PLANTS* **6**: 1–14.
- 21 **McNickle GG, Deyholos MK, Jr JFC. 2016.** Nutrient foraging behaviour of four co-occurring  
22 perennial grassland plant species alone does not predict behaviour with neighbours. *Functional*  
23 *Ecology* **30**: 420–430.
- 24 **Mommer L, van Ruijven J, de Caluwe H, Smit-Tiekstra AE, Wagemaker CAM, Joop Ouborg N,**  
25 **Bögemann GM, van der Weerden GM, Berendse F, de Kroon H. 2010.** Unveiling below-ground  
26 species abundance in a biodiversity experiment: A test of vertical niche differentiation among  
27 grassland species. *Journal of Ecology* **98**: 1117–1127.
- 28 **Oram NJ, Ravenek JM, Barry KE, Weigelt A, Chen H, Gessler A, Gockele A, de Kroon H, van der**  
29 **Paauw JW, Scherer-Lorenzen M, Smit-Tiekstra A, van Ruijven J, Mommer L. 2018.** Below-ground  
30 complementarity effects in a grassland biodiversity experiment are related to deep-rooting  
31 species. *Journal of Ecology* **106**: 265–277.
- 32 **Poorter H, Niklas KJ, Reich PB, Oleksyn J, Poot P, Mommer L. 2012.** Biomass allocation to leaves,  
33 stems and roots: meta-analyses of interspecific variation and environmental control. *New*  
34 *Phytologist* **193**: 30–50.
- 35 **Postma JA, Lynch JP. 2011.** Root cortical aerenchyma enhances the growth of maize on soils with  
36 suboptimal availability of nitrogen, phosphorus, and potassium. *Plant Physiology* **156**: 1190–

- 1 1201.
- 2 **Postma JA, Lynch JP. 2012.** Complementarity in root architecture for nutrient uptake in ancient  
3 maize/bean and maize/bean/squash polycultures. *Annals of botany* **110**: 521–534.
- 4 **Reiss ER, Drinkwater LE. 2018.** Cultivar mixtures: A meta-analysis of the effect of intraspecific  
5 diversity on crop yield: A. *Ecological Applications* **28**: 62–77.
- 6 **R Core Team. 2018.** R: A language and environment for statistical computing. Vienna, Austria:  
7 R Foundation for Statistical Computing. Retrieved from <http://www.r-project.org/>
- 8 **Saengwilai P, Tian X, Lynch JP. 2014.** Low crown root number enhances nitrogen acquisition from  
9 low-nitrogen soils in maize. *Plant Physiology* **166**: 581–589.
- 10 **Schnepf A, Black CK, Couvreur V, Delory BM, Doussan C, Koch A, Koch T, Javaux M, Landl M,**  
11 **Leitner D, Lobet G, Mai TH, Meunier F, Petrich L, Postma JA, Priesack E, Schmidt V,**  
12 **Vanderborght J, Vereecken H, Weber M. 2019.** Call for participation: Collaborative  
13 benchmarking of functional-structural root architecture models. The case of root water uptake.  
14 *bioRxiv*: 808972.
- 15
- 16 **Soleymani A, Shahrajabian MH, Naranjani L. 2011.** Determination of the suitable planting date  
17 and plant density for different cultivars of barley (*Hordeum vulgare* L.) in Fars. *African Journal of*  
18 *Plant Science* **5**: 284–286.
- 19 **Stibbe C, Märlander B. 2002.** Field emergence dynamics significance to intraspecific competition  
20 and growth efficiency in sugar beet (*Beta vulgaris* L.). *European Journal of Agronomy* **17**: 161–  
21 171.
- 22 **Sun J, Ye M, Peng S, Li Y. 2016.** Nitrogen can improve the rapid response of photosynthesis to  
23 changing irradiance in rice (*Oryza sativa* L.) plants. *Scientific Reports* **6**: 1–10.
- 24 **Thuynsma R, Kleinert A, Kossmann J, Valentine AJ, Hills PN. 2016.** The effects of limiting  
25 phosphate on photosynthesis and growth of *Lotus japonicus*. *South African Journal of Botany*  
26 **104**: 244–248.
- 27 **Tilman D. 1990.** Constraints and tradeoffs: toward a predictive theory of competition and  
28 succession. *Oikos* **58**: 3.
- 29 **Wahl S, Ryser P, Edwards PJ. 2001.** Phenotypic plasticity of grass root anatomy in response to  
30 light intensity and nutrient supply. *Annals of Botany* **88**: 1071–1078.
- 31 **Wang Y-L, Almvik M, Clarke N, Eich-Greatorex S, Øgaard AF, Krogstad T, Lambers H, Clarke JL.**  
32 **2015.** Contrasting responses of root morphology and root-exuded organic acids to low  
33 phosphorus availability in three important food crops with divergent root traits. *AoB Plants* **7**:  
34 plv097.
- 35 **Van Wijk MT, Williams M, Gough L, Hobbie SE, Shaver GR. 2003.** Luxury consumption of soil  
36 nutrients: A possible competitive strategy in above-ground and below-ground biomass allocation  
37 and root morphology for slow-growing arctic vegetation? *Journal of Ecology* **91**: 664–676.

- 1 **Warton DI, Duursma RA, Falster DS, Taskinen S. 2012.** smatr 3- an R package for estimation  
2 and inference about allometric lines. *Methods in Ecology and Evolution* **3**: 257–259.
- 3 **Weidlich EWA, Temperton VM, Faget M. 2018.** Neighbourhood stories: role of neighbour  
4 identity, spatial location and order of arrival in legume and non-legume initial interactions.  
5 *Plant and Soil* **424**: 171–182.
- 6 **Wickham H. 2016.** ggplot2: Elegant Graphics for Data Analysis. Springer-Verlag New York.  
7
- 8 **Williamson LC, Ribrioux SPCP, Fitter AH, Ottoline Leyser HM. 2001.** Phosphate availability  
9 regulates root system architecture in *Arabidopsis*. *Plant Physiology* **126**: 875–882.
- 10 **Wright A, Schnitzer SA, Reich PB. 2014.** Living close to your neighbors: The importance of both  
11 competition and facilitation in plant communities. *Ecology* **95**: 2213–2223.
- 12 **Zhang D, Lyu Y, Li H, Tang X, Hu R, Rengel Z, Zhang F, Whalley WR, Davies WJ, Cahill JF, Shen J.**  
13 **2019.** Neighbouring plants modify maize-root foraging for phosphorus: coupling nutrients and  
14 neighbours for improved nutrient-use efficiency. *New Phytologist*. doi: 10.1111/nph.16206
- 15

**Without competition**  
(1 plant rhizobox<sup>-1</sup>)

**With competition**  
(3 plants rhizobox<sup>-1</sup>)

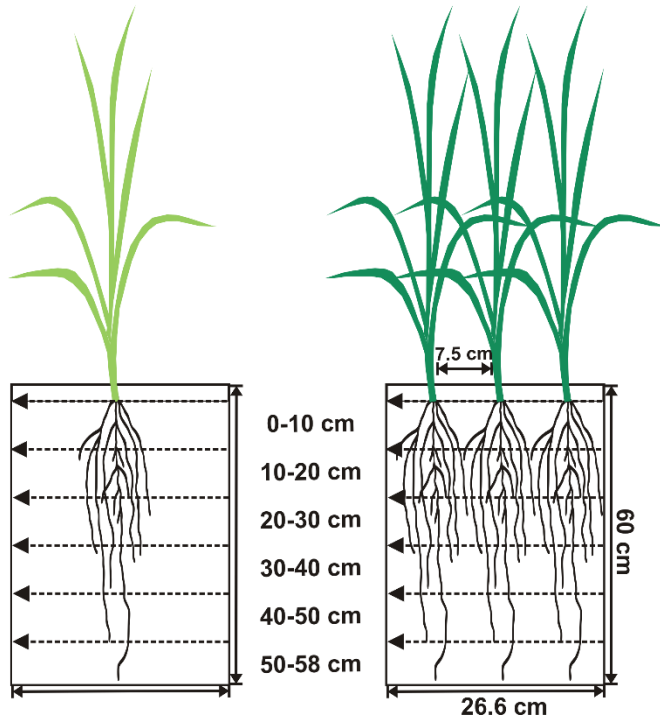

1

2 Fig. 1: Schematic diagram representing barley grown with or without competition in rhizoboxes  
3 and showing the rooting depths sampled to assess differential root foraging responses to four N:P  
4 stoichiometry levels: low N+low P, low N+high P, high N+low P, and high N+high P.

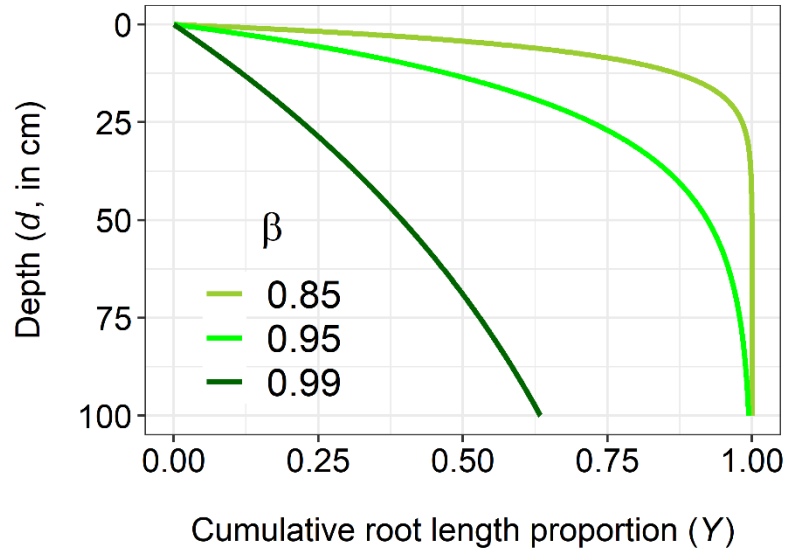

1

2

3 Fig. 2: Cumulative root biomass distribution as a function of soil depth as per Gale and Grigal  
4 (1987). Higher  $\beta$  values imply that a greater proportion of root biomass is located in deeper soil  
5 layers, whereas lower  $\beta$  values imply that a greater proportion of root biomass is located in  
6 shallower soil layers.

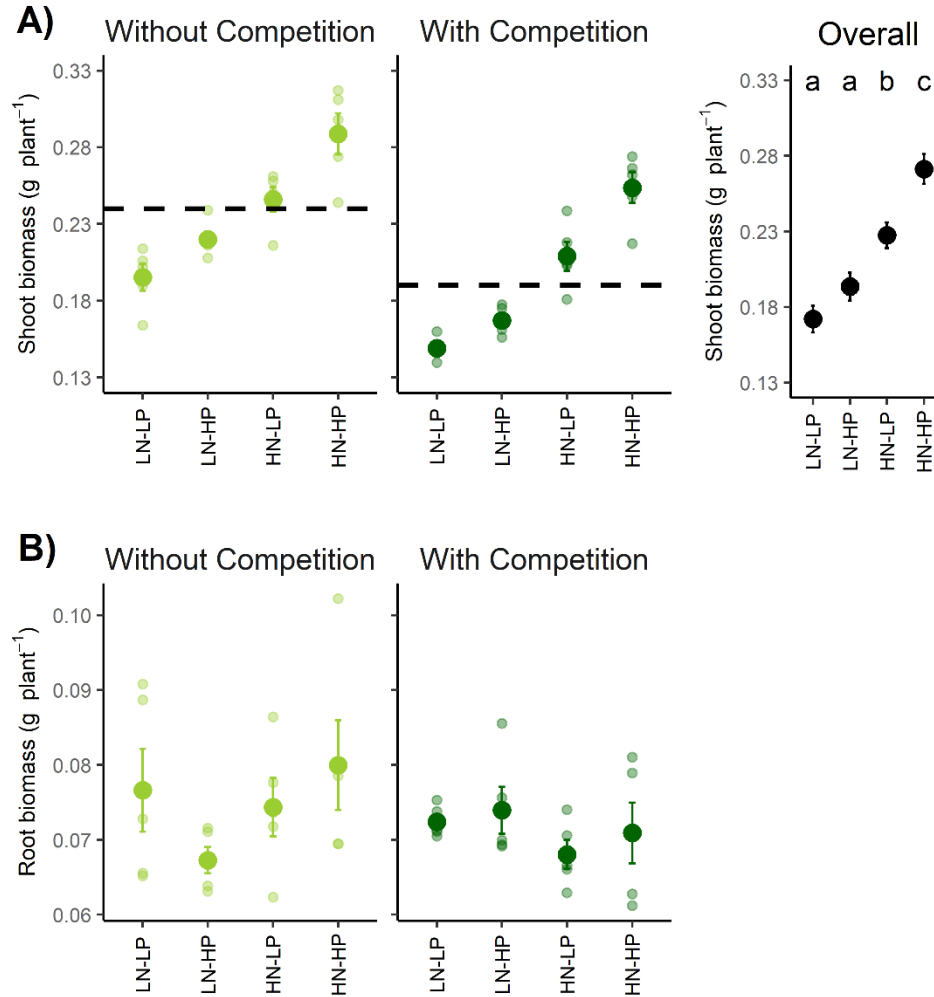

1

2 Fig. 3: A) shoot and B) root biomass (g plant<sup>-1</sup>±SE) across N:P stoichiometry and with and without  
3 competition. LN-LP: low N and low P, LN-HP: low N and high P, HN-LP: high N and low P, and  
4 HN-HP: high N and high P. For shoot biomass, there was no interaction between N:P stoichiometry  
5 and competition. Therefore, a graph showing the results for each N:P stoichiometry level (across  
6 competition levels) is also displayed. For shoot biomass, dashed lines show mean shoot biomass  
7 values without and with competition. For each panel, different letters indicate significant  
8 differences (Tukey's post-hoc,  $P < 0.05$ ).



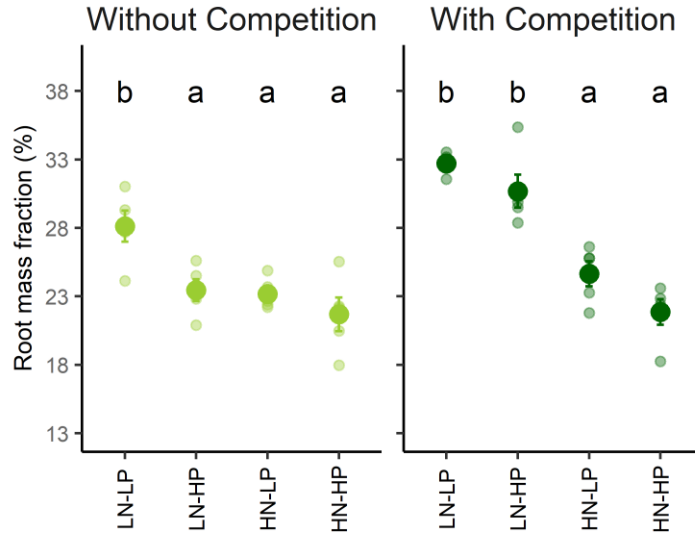

1

2 Fig. 4: Root mass fraction (%) across N:P stoichiometry and with and without competition. LN-  
3 LP: low N and low P, LN-HP: low N and high P, HN-LP: high N and low P, and HN-HP: high N  
4 and high P. For each panel, different letters indicate significant differences (Tukey's post-hoc,  $P$   
5 < 0.05).

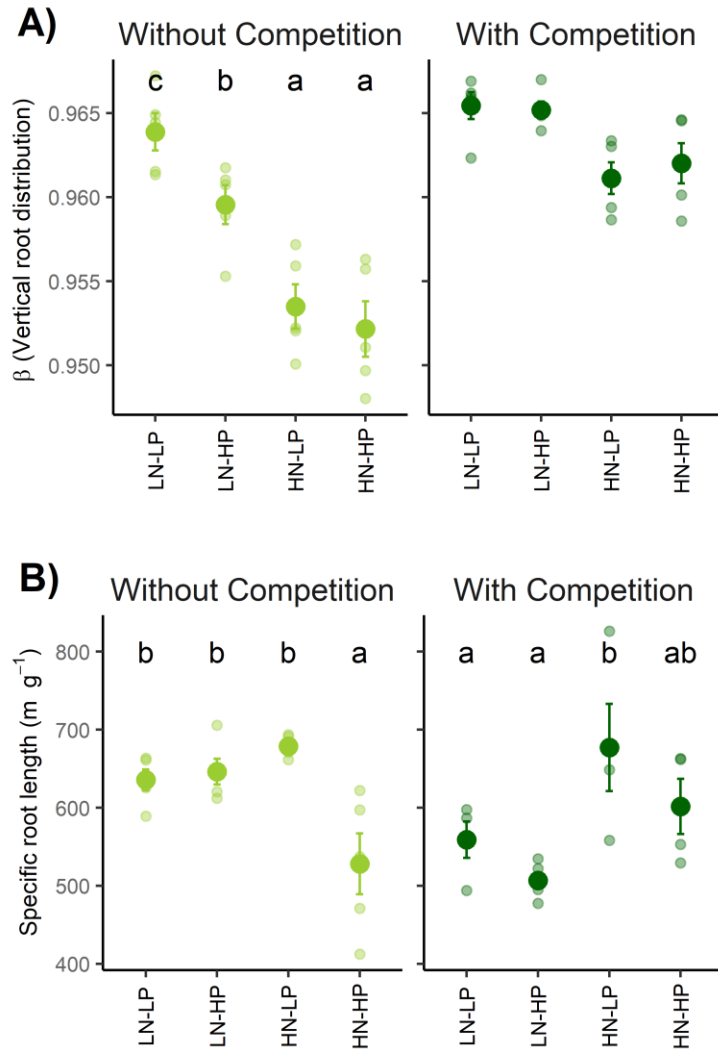

1

2 Fig. 5: A) Vertical root distribution ( $\beta \pm \text{SE}$ , see methods) and B) specific root length ( $\text{m g}^{-1} \pm \text{SE}$ )  
3 across N:P stoichiometry and with and without competition. LN-LP: low N and low P, LN-HP:  
4 low N and high P, HN-LP: high N and low P, and HN-HP: high N and high P. For each panel,  
5 different letters indicate significant differences (Tukey's post-hoc,  $P < 0.05$ ).

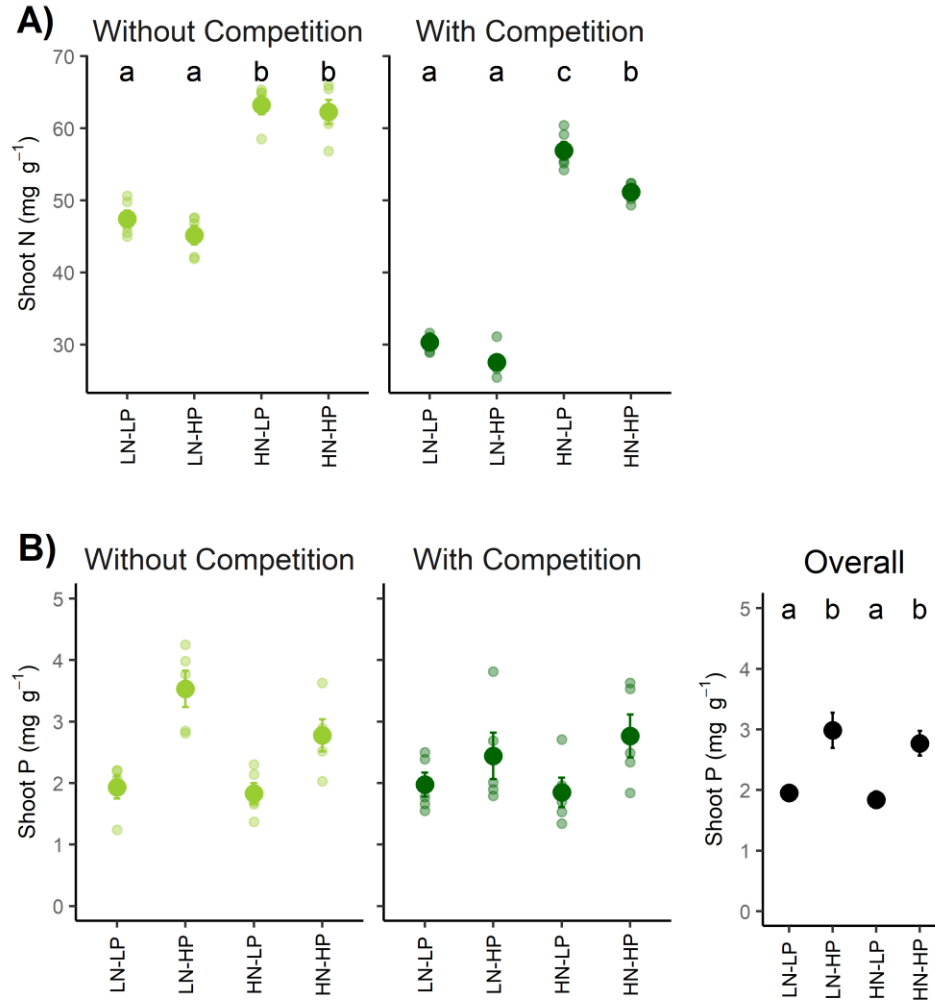

1

2 Fig. 6: A) shoot N and B) shoot P (mg g<sup>-1</sup>±SE) across N:P stoichiometry and with and without  
3 competition. LN-LP: low N and low P, LN-HP: low N and high P, HN-LP: high N and low P, and  
4 HN-HP: high N and high P. For shoot P, there was no interaction between N:P stoichiometry and  
5 competition. Therefore, a graph showing the results for each N:P stoichiometry level (across  
6 competition levels) is also displayed. In each panel, different letters indicate significant differences  
7 (Tukey's post-hoc,  $P < 0.05$ ).

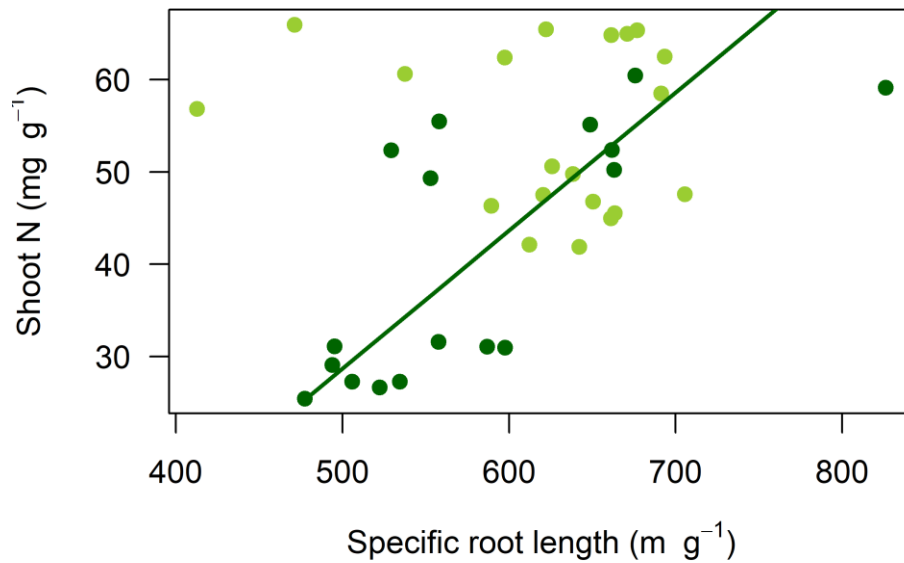

1

2 Fig. 7: Linear relationship between specific root length (m g<sup>-1</sup>) and shoot N concentration (mg g<sup>-1</sup>).  
3 Light green circles represent absence whereas dark green circles represent presence of  
4 competition, respectively. Regression line between shoot N and specific root length is shown only  
5 when competition was present (for dark green).

6

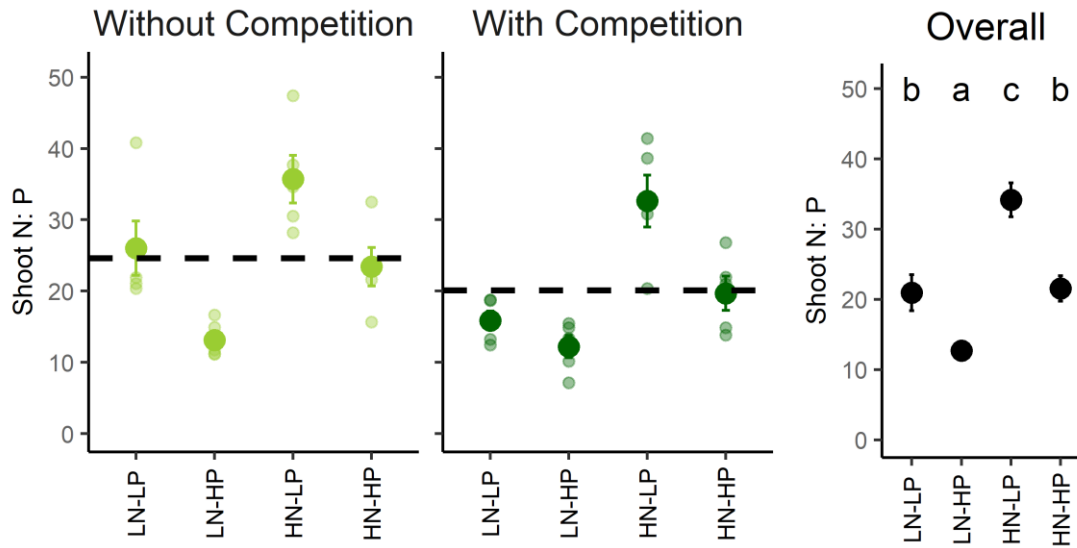

1

2 Supplementary figure S1: Shoot N:P mass ratio ( $\pm$ SE) across N:P stoichiometry and with and  
3 without competition. LN-LP: low N and low P, LN-HP: low N and high P, HN-LP: high N and  
4 low P, and HN-HP: high N and high P. For shoot P, there was no interaction between N:P  
5 stoichiometry and competition. Therefore, a graph showing the results for each N:P stoichiometry  
6 level (across competition levels) is also displayed. Dashed lines show mean shoot N:P values  
7 without and with competition. Different letters indicate significant differences (Tukey's post-hoc,  
8  $P < 0.05$ ).

9

1 Supplementary table 1: Chemical concentration of nutrient solutions provided to plants. The N:P  
 2 mass ratio of each stoichiometry of N and P is also provided in the last row of the table.

| <b>Macronutrients</b>                                 | Stock (M)  | Low N-Low P (LN-LP) | Low N-High P (LN-HP) | High N-Low P (HN-LP) | High N-High P (HN-HP) |
|-------------------------------------------------------|------------|---------------------|----------------------|----------------------|-----------------------|
| KNO <sub>3</sub>                                      | 1          | 0.625               | 0.625                | 2.875                | 2.5                   |
| Ca(NO <sub>3</sub> ) <sub>2</sub> · 4H <sub>2</sub> O | 1          | 0.625               | 0.625                | 2.125                | 2.5                   |
| KH <sub>2</sub> PO <sub>4</sub>                       | 1          | 0.125               | 0.5                  | 0.125                | 0.5                   |
| MgSO <sub>4</sub> · 7H <sub>2</sub> O                 | 1          | 1.0                 | 1.0                  | 1.000                | 1.0                   |
| <b>Micronutrients</b>                                 |            |                     |                      |                      |                       |
|                                                       | Stock (mM) |                     |                      |                      |                       |
| H <sub>3</sub> BO <sub>3</sub> · H <sub>2</sub> O     | 46.3       | 0.5                 | 0.5                  | 0.5                  | 0.5                   |
| MnCl <sub>2</sub> · 4H <sub>2</sub> O                 | 9.2        |                     |                      |                      |                       |
| ZnSO <sub>4</sub> · 7H <sub>2</sub> O                 | 0.77       |                     |                      |                      |                       |
| CuSO <sub>4</sub> · 5H <sub>2</sub> O                 | 0.36       |                     |                      |                      |                       |
| MoO <sub>3</sub> (85% molybdic acid)                  | 0.01       |                     |                      |                      |                       |
| Fe-Na-EDTA                                            | 50.12      | 0.5                 | 0.5                  | 0.5                  | 0.5                   |
| <b>Replacements</b>                                   |            |                     |                      |                      |                       |
|                                                       | Stock (M)  |                     |                      |                      |                       |
| K <sub>2</sub> SO <sub>4</sub>                        | 0.5        | 2.25                | 1.875                |                      |                       |
| CaCl <sub>2</sub> * 2H <sub>2</sub> O                 | 1          | 1.875               | 1.875                |                      |                       |
| <b>N:P mass ratio</b>                                 |            | <b>5.81</b>         | <b>1.45</b>          | <b>22.47</b>         | <b>5.81</b>           |

3
